# Supplementary material for: Deciphering the Variability in Mg/Ca and Stable Oxygen Isotopes of Individual Foraminifera
Source: PubMed Central journal article supplement — Paleoceanogr Paleoclimatol. 2019 May 11;34(5):755–73. doi: 10.1029/2018PA003533 (PMC6686659; doi:10.1029/2018pa003533), 2019-05-11
Supplement: PALO-34-755-s001.pdf [file PALO-34-755-s001.pdf]

Alfred-Wegener-Institut, Telegrafenberg A43, 14473 Potsdam, Germany

Bremen, 7 Mar. 2019

Subject: Cover Letter for *article* re-submission

Dear Editor,

With this cover letter I am re-submitting our manuscript entitled **“Deciphering the variability in Mg/Ca and stable oxygen isotopes of individual foraminifera”** for evaluation for publication in *Paleoceanography and Paleoclimatology*.

We have incorporated most of the requested changes of the reviewers explaining and commenting to them in the Response Letter. The reviews have significantly assisted to improve the manuscript and we hope it is close now to being accepted for publication with *P&P*. In this re-submission we have included a file with the initially submitted manuscript with all changes marked in it, a new clean manuscript file, the response letter, supporting information and the figures.

We look forward to your evaluation and see our manuscript fit for publishing with *Paleoceanography and Paleoclimatology*.

Yours sincerely,  
Dr. Jeroen Groeneveld (on behalf of the co-authors\*)

AWI – ERC SPACE/Department of Geosciences  
University of Bremen  
Klagenfurter Straße 2-4  
Room 5540 Geo-Building  
D-28359 Bremen  
Germany  
Tel.: ++49-421-218 65455  
[jgroeneveld@uni-bremen.de](mailto:jgroeneveld@uni-bremen.de)  
[http://www.marum.de/Jeroen\\_Groeneveld.html](http://www.marum.de/Jeroen_Groeneveld.html)

\* All authors have reviewed the manuscript and agreed upon this submission.

**Dr. Jeroen Groeneveld**

ERC SPACE-project  
Alfred Wegener Institute  
Potsdam

Office:  
MARUM  
Klagenfurter Strasse 2-4  
GEO - 5540  
D-28359 Bremen  
Germany  
Telefon ++49-431-218 65455  
eMail [jgroeneveld@uni-bremen.de](mailto:jgroeneveld@uni-bremen.de)  
www [www.marum.de](http://www.marum.de)

**Alfred Wegener Institute**  
Helmholtz Centre for  
Polar and Marine Research

**POTSDAM**

Telegrafenberg A45  
14473 Potsdam  
Germany  
Phone +49 331 288-2100  
Fax +49 331 288-2122  
[www.awi.de](http://www.awi.de)

Public law institution

Head Office:  
Am Handelshafen 12  
27570 Bremerhaven  
Germany  
Phone +49 471 4831-0  
Fax +49 471 4831-1149  
[www.awi.de](http://www.awi.de)

Board of Governors:  
MinDir Dr. Karl Eugen Huthmacher  
Board of Directors:  
Prof. Dr. Antje Boetius  
(Director)  
Dr. Karsten Wurr  
(Administrative Director)  
Dr. Uwe Nixdorf  
(Vice Director)  
Prof. Dr. Karen H. Wiltshire  
(Vice Director)

Bank account:  
Commerzbank AG,  
Bremerhaven  
BIC/Swift COBADEFF292  
IBAN DE12292400240349192500  
Tax-Id-No. DE 114707273
